# Supplementary material for: Comparison of the Effects of Microbial Inoculants on Fermentation Quality and Microbiota in Napier Grass (Pennisetum purpureum) and Corn (Zea mays L.) Silage
Source: Front Microbiol. 2022 Jan 20;12:784535. doi: 10.3389/fmicb.2021.784535 (PMC8811201; doi:10.3389/fmicb.2021.784535)
Supplement: Supplementary file 3 [file Table_1.XLSX]

## Sheet: sequencing summary
Table S1. Sampling depth analysis of 16S amplicon sequences obtained from corn plant and Napier grass silages. Corn plant and Napier grass silages were inoculated with different tretments (T) on day 0 and collected on day 0 (D0), day 3 (D3) and day 7 (D7). Treatments were based on silage with or without lactic acid bacteria as follows: control silage with no inoculation (T1), silage inoculated wi…
Sample ID	Source	Day	Treatment	Number of reads	Phylum	Class	Order	Family	Genus	ASV
Corn_D0_T1	Corn plant	Day 0	0.85% NaCl (Control)	60736	9	11	33	58	89	602
Corn_D0_T2			L. plantarum J39	71696	7	12	34	56	81	694
Corn_D0_T3			L. brevis BCC42336	74364	9	13	35	60	91	794
Corn_D0_T4			P. pentosaceus TBRC7603	71386	8	12	36	60	92	715
Corn_D0_T5			Combination	74006	8	11	33	61	85	788
Corn_D3_T1_A		Day 3	0.85% NaCl (Control)	96849	7	10	23	39	44	619
Corn_D3_T1_B			0.85% NaCl (Control)	97395	7	9	23	35	50	588
Corn_D3_T2_A			L. plantarum J39	118837	7	9	27	46	63	747
Corn_D3_T2_B			L. plantarum J39	103476	7	10	26	39	55	665
Corn_D3_T3_A			L. brevis BCC42336	113049	6	8	21	28	40	633
Corn_D3_T3_B			L. brevis BCC42336	106263	7	9	23	35	45	676
Corn_D3_T4_A			P. pentosaceus TBRC7603	125278	7	9	26	37	53	726
Corn_D3_T4_B			P. pentosaceus TBRC7603	107000	6	7	24	33	42	615
Corn_D3_T5_A			Combination	100940	6	9	26	41	61	694
Corn_D3_T5_B			Combination	93694	7	11	28	42	59	630
Corn_D7_T1_A		Day 7	0.85% NaCl (Control)	97002	7	10	26	35	46	715
Corn_D7_T1_B			0.85% NaCl (Control)	98663	6	8	23	37	48	552
Corn_D7_T2_A			L. plantarum J39	109854	6	9	29	42	60	692
Corn_D7_T2_B			L. plantarum J39	94711	6	10	28	42	62	602
Corn_D7_T3_A			L. brevis BCC42336	108578	7	9	23	33	43	627
Corn_D7_T3_B			L. brevis BCC42336	93870	7	9	23	36	44	573
Corn_D7_T4_A			P. pentosaceus TBRC7603	107587	6	8	26	39	48	661
Corn_D7_T4_B			P. pentosaceus TBRC7603	115766	6	9	27	45	57	698
Corn_D7_T5_A			Combination	111900	7	10	32	50	71	808
Corn_D7_T5_B			Combination	95673	6	10	30	48	66	677
			Average	97942.9
			SD	16360.4
Sample ID	Source	Day	Treatment	Number of reads	Phylum	Class	Order	Family	Genus	ASV
Napier_D0_T1	Napier grass	Day 0	0.85% NaCl (Control)	93978	6	10	28	42	67	300
Napier_D0_T2			L. plantarum J39	91260	5	8	25	42	61	318
Napier_D0_T3			L. brevis BCC42336	87905	5	7	23	36	52	272
Napier_D0_T4			P. pentosaceus TBRC7603	80133	6	9	28	42	54	282
Napier_D0_T5			Combination	88186	6	10	26	50	65	338
Napier_D3_T1_A		Day 3	0.85% NaCl (Control)	90413	5	7	14	21	28	508
Napier_D3_T1_B			0.85% NaCl (Control)	88011	5	7	18	27	33	525
Napier_D3_T2_A			L. plantarum J39	103147	4	6	14	21	23	258
Napier_D3_T2_B			L. plantarum J39	99460	4	6	14	22	23	263
Napier_D3_T3_A			L. brevis BCC42336	102430	5	6	16	24	28	468
Napier_D3_T3_B			L. brevis BCC42336	111104	5	6	12	20	24	702
Napier_D3_T4_A			P. pentosaceus TBRC7603	121915	5	7	16	22	29	426
Napier_D3_T4_B			P. pentosaceus TBRC7603	128966	5	7	20	29	38	394
Napier_D3_T5_A			Combination	117594	5	6	16	23	24	543
Napier_D3_T5_B			Combination	109854	5	7	16	22	20	508
Napier_D7_T1_A		Day 7	0.85% NaCl (Control)	101199	6	9	17	23	24	568
Napier_D7_T1_B			0.85% NaCl (Control)	96929	5	7	15	20	30	560
Napier_D7_T2_A			L. plantarum J39	95976	5	6	20	30	33	311
Napier_D7_T2_B			L. plantarum J39	120868	5	6	19	26	31	304
Napier_D7_T3_A			L. brevis BCC42336	96424	4	6	15	21	28	480
Napier_D7_T3_B			L. brevis BCC42336	111624	5	7	18	27	33	525
Napier_D7_T4_A			P. pentosaceus TBRC7603	103969	5	7	19	26	32	429
Napier_D7_T4_B			P. pentosaceus TBRC7603	98966	4	5	17	23	26	378
Napier_D7_T5_A			Combination	119906	5	8	22	28	34	492
Napier_D7_T5_B			Combination	121902	5	8	18	27	31	508
			Total	103285
			Average	13114.4
			SD	18718.1
