# Supplementary material for: Comparison of the Effects of Microbial Inoculants on Fermentation Quality and Microbiota in Napier Grass (Pennisetum purpureum) and Corn (Zea mays L.) Silage
Source: Front Microbiol. 2022 Jan 20;12:784535. doi: 10.3389/fmicb.2021.784535 (PMC8811201; doi:10.3389/fmicb.2021.784535)
Supplement: Supplementary file 4 [file Table_2.XLSX]

## Sheet: read count
Table S2. Normalized raw read counts and taxonomy classification of 16S amplicon sequences. Corn plant and Napier grass silages were inoculated with different tretments (T) on day 0 and collected on day 0 (D0), day 3 (D3) and day 7 (D7). Treatments were based on silage with or without lactic acid bacteria as follows: control silage with no inoculation (T1), silage inoculated with Lactobacillus pl…
Phylum	Genus	Corn_D0_T1	Corn_D0_T2	Corn_D0_T3	Corn_D0_T4	Corn_D0_T5	Corn_D3_T1_A	Corn_D3_T1_B	Corn_D3_T2_A	Corn_D3_T2_B	Corn_D3_T3_A	Corn_D3_T3_B	Corn_D3_T4_A	Corn_D3_T4_B	Corn_D3_T5_A	Corn_D3_T5_B	Corn_D7_T1_A	Corn_D7_T1_B	Corn_D7_T2_A	Corn_D7_T2_B	Corn_D7_T3_A	Corn_D7_T3_B	Corn_D7_T4_A	Corn_D7_T4_B	Corn_D7_T5_A	Corn_D7_T5_B	Napier_D0_T1	Napier_D0_T2	Napier_D0_T3	Napier_D0_T4	Napier_D0_T5	Napier_D3_T1_A	Napier_D3_T1_B	Napier_D3_T2_A	Napier_D3_T2_B	Napier_D3_T3_A	Napier_D3_T3_B	Napier_D3_T4_A	Napier_D3_T4_B	Napier_D3_T5_A	Napier_D3_T5_B	Napier_D7_T1_A	Napier_D7_T1_B	Napier_D7_T2_A	Napier_D7_T2_B	Napier_D7_T3_A	Napier_D7_T3_B	Napier_D7_T4_A	Napier_D7_T4_B
Actinobacteria	Actinomyces	33	0	0	0	0	0	0	0	0	0	0	0	0	0	0	0	0	0	0	0	0	0	0	18	0	0	0	0	0	0	0	0	0	0	0	0	0	0	0	0	0	0	0	0	0	0	0	0
	Actinomycetospora	0	0	0	0	0	0	0	0	0	0	0	0	0	0	0	0	0	0	0	0	0	0	17	0	0	0	0	0	0	0	0	0	0	0	0	0	0	0	0	0	0	0	0	0	0	0	0	0
	Aeromicrobium	82	84	0	126	0	0	0	0	0	0	0	0	0	0	0	0	0	0	0	0	0	0	0	0	0	511	482	478	562	465	0	0	58	0	0	0	0	16	0	0	30	103	188	0	270	125	77	71
	Agrococcus	0	0	0	0	0	0	0	0	0	0	0	0	0	0	0	0	0	73	0	0	0	0	0	0	0	0	0	0	0	0	0	0	0	0	0	0	0	0	0	0	0	0	0	0	0	0	0	0
	Amycolatopsis	0	0	0	0	0	0	0	0	0	0	0	0	0	40	0	0	0	0	0	0	0	0	0	0	0	0	131	0	0	0	0	0	0	0	0	0	0	0	0	0	0	0	0	0	0	0	0	0
	Arthrobacter	198	293	188	0	959	0	0	0	0	0	0	0	0	0	0	0	0	0	0	0	0	0	0	0	0	0	0	0	0	0	44	0	0	0	0	0	0	0	0	0	0	0	0	0	0	0	0	0
	Bifidobacterium	296	614	390	322	959	114	62	135	193	0	0	0	0	0	149	0	0	218	306	18	0	0	43	268	251	0	0	0	0	0	0	0	0	0	0	0	0	0	0	0	0	0	0	0	0	0	0	0
	Brachybacterium	2898	3264	1721	2017	3000	83	0	0	0	0	0	0	0	188	0	0	0	0	84	0	0	0	0	152	0	0	33	205	212	181	0	0	0	20	0	0	0	54	0	0	0	0	83	0	0	0	0	0
	Brevibacterium	461	781	390	588	1027	0	0	0	0	0	0	0	0	0	32	0	0	0	0	0	0	0	0	0	0	0	44	46	0	159	0	0	0	0	0	0	0	0	0	0	0	0	0	0	0	0	0	0
	Cellulomonas	49	0	27	1639	446	0	0	0	0	0	0	0	19	20	0	0	0	0	0	0	0	0	17	45	282	447	449	0	237	374	0	0	0	131	0	0	0	0	0	0	0	0	0	0	0	0	29	0
	Corynebacterium	33	153	0	224	1757	0	0	0	29	0	0	0	0	20	0	0	0	0	0	0	0	0	0	27	31	0	0	0	0	0	0	0	0	0	0	0	0	0	0	55	0	0	0	0	0	0	0	0
	Corynebacterium 1	3573	4407	2057	2550	4919	0	370	1397	937	186	687	96	140	1268	897	433	375	1848	1605	184	405	158	225	2645	2864	532	0	0	0	329	33	0	0	0	0	0	0	0	0	0	0	0	0	0	0	0	0	0
	Curtobacterium	5582	1757	3873	4287	1811	0	0	0	0	0	0	136	0	0	0	0	0	0	264	0	0	0	570	0	0	5576	5819	4846	3457	5522	420	579	407	0	947	1080	591	721	0	510	0	444	781	530	477	439	635	546
	Cutibacterium	0	0	0	28	0	0	0	0	0	0	0	0	0	0	0	0	0	0	0	0	0	0	0	0	0	0	0	0	0	0	0	0	0	0	0	0	0	0	0	0	0	0	0	0	0	0	0	0
	Dietzia	0	0	0	0	0	0	0	0	0	0	0	0	0	0	0	0	0	0	0	0	0	0	0	0	0	0	66	0	0	0	0	0	0	0	0	0	0	0	0	0	0	0	0	0	0	0	0	0
	Geodermatophilus	0	0	0	28	0	0	0	0	0	0	0	0	0	0	0	0	20	0	0	0	0	0	0	0	0	74	0	0	75	0	0	0	0	0	0	0	0	0	0	0	0	0	0	0	0	0	0	0
	Georgenia	0	0	0	0	0	0	0	0	0	0	0	0	0	178	0	0	0	0	0	0	0	0	0	0	0	0	0	0	0	0	0	0	0	0	0	0	0	0	0	0	0	0	0	0	0	0	0	0
	Glutamicibacter	0	0	0	280	0	0	0	0	0	0	0	0	0	0	0	0	0	0	0	0	0	0	0	0	0	0	0	239	0	0	0	0	0	0	0	72	0	0	0	0	0	0	0	0	0	0	0	0
	Gordonia	1202	349	1251	1373	446	258	257	252	0	168	0	56	28	0	160	113	304	401	686	221	64	260	363	617	596	192	175	273	287	556	44	0	0	0	0	0	0	0	0	0	0	0	0	0	0	0	0	0
	Kineococcus	0	0	323	448	95	0	0	0	0	0	0	0	19	0	0	0	0	0	32	0	0	19	0	0	0	809	888	705	624	578	0	45	0	0	0	0	0	70	0	0	0	0	63	91	0	0	0	0
	Kineosporia	0	0	0	0	0	0	0	0	0	0	0	0	0	0	0	0	0	0	0	0	0	0	0	0	0	85	33	0	0	0	0	0	0	0	0	0	0	31	0	0	0	0	0	0	0	0	0	51
	Kitasatospora	0	0	0	0	0	0	0	0	0	0	0	16	0	0	0	0	0	0	106	0	0	0	0	0	0	0	0	0	0	0	0	0	0	0	0	0	0	0	0	0	0	0	0	0	0	0	0	0
	Kocuria	3112	1269	1654	3138	892	0	0	825	0	0	28	0	0	0	0	0	91	0	0	0	0	0	0	0	0	43	515	0	0	34	0	0	0	0	0	0	0	0	0	0	0	0	0	0	0	36	0	71
	Lechevalieria	0	0	0	0	0	0	0	0	0	0	0	0	19	0	0	0	0	0	0	0	0	0	0	0	0	0	0	0	0	0	0	0	0	0	0	0	0	0	0	0	0	0	0	0	0	0	0	0
	Leucobacter	0	377	67	28	351	0	0	67	68	0	28	48	0	0	64	0	30	0	0	0	0	0	0	447	52	841	614	171	724	0	0	0	0	0	0	0	0	0	0	0	0	0	0	0	0	0	0	0
	Marmoricola	0	0	0	0	0	0	0	0	0	0	0	0	0	0	0	0	0	0	0	0	0	0	0	0	0	64	0	228	100	0	0	0	0	0	0	0	0	0	17	0	0	0	0	0	0	0	0	0
	Microbacterium	560	321	1224	4132	1527	650	0	917	792	0	104	255	327	307	395	1216	476	901	1088	157	437	623	190	1644	2237	404	0	80	0	0	22	216	0	181	0	0	221	47	323	0	0	0	0	0	0	152	0	0
	Micrococcus	0	0	0	0	0	0	0	0	0	0	0	0	0	0	0	0	0	0	0	0	0	0	0	0	0	160	0	0	0	0	0	0	0	0	0	0	0	0	0	0	0	0	0	0	0	0	0	0
	Micromonospora	0	0	0	84	0	0	0	0	0	0	0	0	0	0	0	0	0	0	0	0	0	28	43	0	0	0	0	0	25	23	0	0	0	0	0	0	0	0	0	0	0	0	0	0	0	0	0	0
	Mycobacterium	1762	572	2461	1667	851	351	287	480	483	363	179	152	364	525	630	206	345	1438	824	322	309	167	337	1162	836	160	175	0	0	159	0	0	0	0	0	0	16	0	0	0	0	0	250	0	0	0	0	0
	Nakamurella	0	0	0	0	0	0	0	0	0	0	0	0	0	0	0	0	0	0	0	0	0	0	0	0	0	0	0	23	0	0	0	0	0	0	0	0	0	0	0	0	0	0	0	0	0	0	0	0
	Nesterenkonia	0	0	0	0	0	0	0	0	0	0	0	0	0	0	0	0	0	0	0	0	0	0	0	0	0	607	0	523	774	340	44	0	0	0	0	0	0	54	0	0	0	0	0	0	187	242	87	0
	Nocardioides	626	98	430	406	81	0	0	0	0	0	0	0	0	0	0	31	0	0	74	18	0	0	0	0	0	149	0	46	25	79	0	0	0	20	0	0	0	0	0	0	0	0	0	33	21	0	29	0
	Nocardiopsis	543	544	215	28	851	0	0	17	116	0	0	0	0	89	235	0	0	82	0	0	0	0	0	447	502	0	0	0	0	0	0	0	0	0	0	0	0	0	0	0	0	0	0	0	0	0	0	0
	Oerskovia	0	0	0	0	0	0	0	0	0	0	0	0	0	238	0	0	0	0	0	0	0	0	0	0	0	0	0	0	0	0	0	0	0	0	0	0	0	0	0	0	0	0	0	0	0	0	0	0
	Ornithinimicrobium	0	0	0	0	0	0	0	0	0	0	0	0	0	0	0	0	0	0	0	0	0	0	0	0	0	53	0	0	0	0	0	0	0	0	0	0	0	0	0	0	0	0	0	0	0	0	0	0
	Pseudarthrobacter	0	167	40	0	0	0	0	0	0	0	0	0	0	0	0	0	0	0	0	0	0	0	35	0	0	0	0	0	0	0	0	0	0	0	0	0	0	0	0	0	0	0	0	0	0	0	0	0
	Pseudonocardia	214	0	309	0	27	0	0	0	0	0	0	24	0	0	0	0	0	0	0	0	0	0	112	0	0	319	460	353	287	420	0	0	0	0	0	0	0	0	0	0	0	0	0	0	0	0	0	91
	Rhodococcus	0	181	0	0	0	0	0	0	0	0	0	0	0	20	0	0	0	0	0	0	0	0	0	0	21	117	285	0	0	79	0	0	0	0	0	0	0	0	0	0	0	0	0	0	0	0	0	0
	Rubrobacter	0	0	0	0	0	0	0	0	0	0	0	0	0	0	0	0	0	0	0	0	0	0	17	0	0	0	0	0	0	0	0	0	0	0	0	0	0	0	0	0	0	0	0	0	0	0	0	0
	Saccharomonospora	0	0	27	0	0	0	0	0	0	0	0	0	0	0	0	0	0	0	0	0	0	0	0	0	0	0	0	0	0	0	0	0	0	0	0	0	0	0	0	0	0	0	0	0	0	0	0	0
	Streptomyces	1498	488	471	196	1108	52	0	244	19	0	292	32	47	109	53	41	0	36	211	18	0	46	0	1126	334	0	110	0	87	68	0	0	0	0	0	0	0	23	0	0	0	103	0	0	145	18	0	0
	Tessaracoccus	0	0	0	42	0	0	0	0	0	0	0	0	0	0	0	0	0	0	0	0	0	0	0	0	0	0	0	0	0	0	0	0	0	0	0	0	0	0	0	0	0	0	0	0	0	0	0	0
	Tsukamurella	33	0	0	0	0	0	0	0	0	0	0	0	0	0	0	0	0	0	0	0	0	0	0	0	0	0	0	0	0	0	0	0	0	0	0	0	0	0	0	0	0	0	0	0	0	0	0	0
	Williamsia	0	0	0	0	0	0	0	0	0	0	0	0	0	0	0	0	0	0	0	0	0	0	0	0	0	0	0	0	0	0	0	0	0	0	0	0	0	0	0	0	0	0	0	0	0	0	0	0
	Unassigned	7557	7099	4397	4959	8553	1538	1540	3846	3315	504	2334	463	495	3388	3330	1082	791	4078	3896	405	1065	734	1019	13673	7296	3980	4887	4584	4043	4853	88	23	78	161	264	180	41	109	94	164	415	41	552	521	363	188	19	162
	Actinobacteria Total	30312	22819	21516	28591	29660	3046	2516	8179	5953	1221	3651	1277	1458	6390	5945	3124	2433	9076	9175	1345	2280	2036	2989	22270	15302	15121	15165	12798	11518	14220	697	864	543	513	1211	1332	869	1124	434	728	445	691	1917	1175	1462	1200	875	990
Bacteroidetes	Chitinophaga	0	0	54	28	0	0	0	0	0	0	0	0	0	0	0	0	20	0	0	0	0	0	0	0	0	0	0	0	0	0	0	0	0	0	0	0	0	0	0	0	0	0	0	0	0	0	0	0
	Chryseobacterium	6701	2566	10610	12902	3270	712	873	1447	1285	796	1073	830	570	1030	1291	660	983	1302	1531	1041	1353	1283	1460	2493	2185	511	373	398	437	510	33	23	0	0	49	0	57	16	0	0	0	0	281	149	0	81	135	0
	Dyadobacter	280	195	202	0	108	0	0	0	58	0	0	0	0	0	21	0	0	0	0	0	0	0	0	161	0	0	0	0	0	34	0	0	0	0	0	0	0	0	0	0	0	0	0	0	0	0	0	0
	Dysgonomonas	0	28	0	0	0	0	0	0	0	0	0	0	0	0	0	0	0	0	0	0	0	0	0	0	0	0	0	0	0	0	0	0	0	0	0	0	0	0	0	0	0	0	0	0	0	0	0	0
	Emticicia	0	0	0	0	0	0	0	0	0	0	0	0	0	0	0	0	0	0	0	0	0	0	0	36	0	0	0	0	0	0	0	0	0	0	0	0	0	0	0	0	0	0	0	0	0	0	0	0
	Flavisolibacter	33	0	0	0	0	0	0	0	0	0	0	0	0	0	0	0	0	0	0	0	0	0	0	0	0	0	0	0	0	0	0	0	0	0	0	0	0	0	0	0	0	0	0	0	0	0	0	0
	Flavobacterium	560	404	457	448	716	31	0	34	0	0	0	0	0	317	459	0	71	346	317	0	32	56	69	1564	638	0	0	0	0	91	0	0	0	0	0	0	0	0	0	0	0	0	0	0	0	0	0	0
	Flectobacillus	0	0	0	0	54	0	0	0	0	0	0	0	0	0	0	0	0	0	0	0	0	0	0	0	0	0	0	0	0	0	0	0	0	0	0	0	0	16	17	0	0	0	0	0	0	0	0	0
	Hymenobacter	33	0	81	784	135	0	31	17	29	0	0	32	0	0	75	0	0	82	0	55	0	37	35	71	31	96	33	91	100	113	0	0	0	0	0	0	0	0	0	0	0	0	31	0	0	0	19	0
	Larkinella	0	0	0	0	0	0	0	0	0	0	0	0	0	0	0	0	0	0	0	0	0	28	0	0	0	0	0	0	0	0	0	0	0	0	0	0	0	0	0	0	0	0	0	0	0	0	0	0
	Mucilaginibacter	247	42	67	182	243	41	51	0	0	0	0	16	0	79	107	0	0	109	137	0	0	0	0	170	0	74	55	0	0	102	0	0	0	0	0	0	0	0	17	0	0	0	0	0	0	0	0	0
	Niabella	0	0	0	0	0	0	0	0	0	0	0	0	0	0	0	0	0	18	53	0	0	0	26	0	0	0	0	0	0	0	0	0	0	0	0	0	0	0	0	0	0	0	0	0	0	0	0	0
	Nibrella	0	0	0	0	0	0	0	0	19	0	0	0	0	0	0	0	0	0	0	0	0	0	0	0	0	0	0	0	0	0	0	0	0	0	0	0	0	0	0	0	0	0	0	0	0	0	0	0
	Nubsella	0	0	0	0	0	0	0	0	0	0	0	0	0	0	0	0	0	0	0	0	0	0	0	0	0	43	0	0	0	0	0	0	0	0	0	0	0	0	0	0	0	0	0	0	0	0	0	0
	Olivibacter	99	0	0	0	0	0	0	0	0	0	0	0	0	0	0	0	0	0	0	0	0	0	0	0	0	0	0	0	0	0	0	0	0	0	0	0	0	0	0	0	0	0	0	0	0	0	0	0
	Pedobacter	576	251	350	504	0	0	0	0	58	0	19	16	0	0	21	0	0	127	95	0	0	0	43	116	94	0	44	0	0	0	0	0	0	0	0	0	0	0	0	0	0	0	0	0	0	0	19	0
	Pontibacter	0	0	0	0	0	0	0	0	0	0	0	0	0	0	0	0	0	0	0	0	0	0	0	0	0	0	33	23	0	0	0	0	0	0	0	0	0	0	0	0	0	0	0	0	0	18	0	0
	Porphyromonas	0	0	0	0	0	0	0	0	0	0	0	0	0	0	0	0	0	0	0	0	0	0	0	18	0	0	0	0	0	0	0	0	0	0	0	0	0	0	0	0	0	0	0	0	0	0	0	0
	Siphonobacter	0	0	67	0	0	0	0	0	0	0	0	0	0	0	0	0	0	0	0	0	0	0	0	0	0	0	0	0	0	45	0	0	0	0	0	0	0	0	0	0	0	0	0	0	0	0	0	0
	Sphingobacterium	2898	2455	2595	4048	3919	423	267	1111	1034	177	809	112	159	1100	1644	567	152	1620	1309	28	192	223	302	3485	2425	181	197	0	125	306	0	0	0	0	0	0	0	31	0	0	0	31	0	132	0	0	0	0
	Spirosoma	280	0	202	336	0	0	0	0	0	0	0	0	0	0	0	0	20	0	0	0	0	0	0	0	0	53	33	80	0	0	0	0	0	0	0	0	0	0	0	0	0	0	0	0	0	0	0	0
	Taibaiella	82	28	148	0	108	0	0	42	0	0	38	0	0	0	0	0	0	18	0	0	21	0	0	80	0	0	0	0	0	0	0	0	0	0	0	0	0	0	0	0	0	0	0	0	0	0	0	0
	Terrimonas	0	0	0	0	0	0	0	0	0	0	0	0	0	0	0	0	0	18	0	0	0	0	0	0	0	0	0	0	0	0	0	0	0	0	0	0	0	0	0	0	0	0	0	0	0	0	0	0
	Unassigned	2009	837	2380	2816	851	207	133	210	106	44	320	160	121	218	267	247	20	446	317	138	170	297	233	634	94	766	603	375	537	612	0	0	0	0	0	0	0	0	0	18	49	0	63	66	0	81	144	0
	Bacteroidetes Total	13797	6807	17213	22049	9405	1415	1355	2861	2590	1017	2259	1165	850	2744	3885	1474	1267	4087	3759	1262	1768	1924	2168	8829	5467	1724	1370	967	1198	1814	33	23	0	0	49	0	57	62	34	18	49	31	375	347	0	179	317	0
Chloroflexi	Unassigned	66	0	67	0	41	0	0	0	0	0	19	0	0	0	0	0	0	0	0	0	0	0	0	18	0	0	0	0	0	0	0	0	0	0	0	18	0	0	0	0	0	0	0	0	0	0	0	0
	Chloroflexi Total	66	0	67	0	41	0	0	0	0	0	19	0	0	0	0	0	0	0	0	0	0	0	0	18	0	0	0	0	0	0	0	0	0	0	0	18	0	0	0	0	0	0	0	0	0	0	0	0
Cyanobacteria	Candidatus Gloeomargarita	0	0	0	0	0	0	0	0	0	0	0	0	0	0	0	0	0	0	0	0	0	0	0	0	0	0	0	0	0	0	0	0	0	0	0	0	0	0	0	0	0	0	0	25	0	0	0	0
	Foliisarcina CENA333	0	0	0	0	0	0	0	0	0	0	0	0	0	0	0	0	0	0	0	0	0	0	0	0	0	0	0	0	0	0	0	0	0	0	0	0	0	16	0	0	0	0	0	0	0	0	0	0
	Iphinoe LOS-B1	0	0	0	0	0	0	0	0	0	0	0	0	0	0	0	0	0	0	0	0	0	0	0	0	0	0	0	0	0	0	0	0	0	0	0	0	0	0	0	0	0	0	0	0	0	0	0	182
	Loriellopsis LF-B5	0	0	0	0	0	0	0	0	0	0	0	0	0	0	0	0	0	0	0	0	0	0	0	0	0	32	0	0	0	0	0	0	0	0	0	0	0	0	0	0	0	0	0	0	0	0	0	0
	Unassigned	80644	75611	229358	184658	70819	37264	31398	49395	51481	45750	62872	30819	29336	49396	42970	28175	35535	66579	79199	40984	52221	46325	48797	79830	60163	687012	624348	653763	633547	614939	182673	199714	258427	261402	332598	280854	368142	337849	354499	349027	119606	77232	183733	163186	191000	169954	257057	306974
	Cyanobacteria Total	80644	75611	229358	184658	70819	37264	31398	49395	51481	45750	62872	30819	29336	49396	42970	28175	35535	66579	79199	40984	52221	46325	48797	79830	60163	687044	624348	653763	633547	614939	182673	199714	258427	261402	332598	280854	368142	337864	354499	349027	119606	77232	183733	163211	191000	169954	257057	307156
Deinococcus-Thermus	Deinococcus	823	265	1130	1751	149	217	185	278	222	124	75	80	19	89	224	340	172	373	454	55	96	223	173	366	261	21	0	0	25	0	0	0	0	0	0	0	0	0	0	0	20	0	0	0	0	0	0	0
	Deinococcus-Thermus Total	823	265	1130	1751	149	217	185	278	222	124	75	80	19	89	224	340	172	373	454	55	96	223	173	366	261	21	0	0	25	0	0	0	0	0	0	0	0	0	0	0	20	0	0	0	0	0	0	0
Firmicutes	Aerococcus	280	0	0	224	149	0	0	0	0	0	0	0	0	0	0	0	0	0	0	0	0	0	0	0	0	149	0	80	0	68	0	170	0	0	29	72	0	0	0	0	49	93	0	0	0	27	0	0
	Alkalibacterium	0	0	0	0	0	0	0	0	0	0	0	0	0	0	0	0	0	0	0	0	0	0	0	0	0	234	110	0	150	181	0	0	0	0	29	36	0	0	0	0	0	0	0	0	0	0	0	0
	Anaerobacillus	395	0	255	0	27	0	0	0	0	0	0	0	0	0	0	0	0	0	0	0	0	0	0	0	0	0	0	0	0	0	0	0	0	0	0	0	0	0	0	0	0	52	0	0	0	0	0	0
	Aneurinibacillus	0	0	0	0	0	0	0	0	0	0	0	0	0	0	0	0	0	0	0	0	0	0	0	0	0	43	0	0	0	0	0	0	0	0	0	0	0	0	0	0	0	0	0	0	0	0	0	0
	Asaccharospora	0	0	0	42	0	0	0	0	0	0	0	0	0	0	0	0	0	0	0	0	0	0	0	0	0	0	0	0	0	0	0	0	0	0	0	0	0	0	0	0	0	0	0	0	0	0	0	0
	Bacillus	790	1269	740	462	838	0	0	404	338	0	0	0	0	129	0	351	111	692	1383	55	32	46	43	1984	1390	11162	13215	10295	11057	12201	0	193	29	40	0	162	246	264	128	291	0	0	31	116	0	36	0	71
	Brevibacillus	0	0	0	0	0	21	0	0	0	0	0	0	0	0	0	0	0	0	0	0	0	0	0	0	0	0	0	0	0	0	0	0	0	0	0	0	0	0	0	0	0	0	0	0	0	0	0	0
	Carnobacterium	33	488	471	98	243	21	0	185	0	0	75	48	0	0	0	258	0	100	95	129	128	46	17	572	230	0	0	0	0	0	0	68	0	0	205	0	41	0	0	0	0	0	0	0	0	0	0	0
	Cellulosilyticum	0	0	0	0	0	0	0	0	0	0	0	0	0	0	0	0	0	0	0	0	0	0	0	0	0	64	0	0	0	0	0	0	0	0	0	0	0	0	0	0	0	0	0	0	0	0	0	0
	Chungangia	0	0	0	0	0	0	0	0	0	0	0	0	0	20	0	0	0	0	0	0	0	0	0	0	0	0	0	0	0	0	0	0	0	0	0	0	0	0	0	0	0	0	0	0	0	0	0	0
	Clostridium sensu stricto 1	774	893	108	350	1054	0	92	0	290	0	19	0	0	168	96	0	132	674	560	46	0	0	0	1287	1610	0	0	0	0	0	55	0	0	0	0	0	0	0	0	0	0	21	0	0	0	0	0	0
	Clostridium sensu stricto 12	0	0	0	0	0	0	0	0	0	0	0	0	0	0	0	0	0	0	0	0	0	0	0	27	63	0	0	0	0	0	0	0	0	0	0	0	0	0	0	0	306	918	0	0	0	0	0	0
	Clostridium sensu stricto 13	0	126	0	0	0	0	0	34	0	0	0	0	0	0	0	0	0	0	21	0	0	0	0	36	94	0	0	0	0	0	0	0	0	0	0	0	0	0	0	0	0	0	0	0	0	0	0	0
	Clostridium sensu stricto 15	33	0	0	0	0	0	0	0	0	0	0	0	0	0	0	0	0	0	0	0	0	0	0	0	0	0	0	0	0	0	0	0	0	0	0	0	0	0	0	0	0	0	0	0	0	0	0	0
	Clostridium sensu stricto 19	0	0	0	0	0	0	0	0	0	0	19	0	0	0	0	0	0	0	0	0	0	0	0	0	0	0	0	0	0	0	0	0	0	0	0	0	0	0	0	0	0	0	0	0	0	0	0	0
	Cohnella	0	0	0	28	0	0	0	0	0	0	0	0	0	0	0	0	0	0	0	0	0	0	0	0	0	0	0	0	0	0	0	0	0	0	0	0	0	0	0	0	0	0	0	0	0	0	0	0
	Crassaminicella	0	0	0	0	0	0	0	0	0	0	0	0	0	0	0	0	0	0	0	0	0	0	0	0	21	0	0	0	0	0	0	0	0	0	0	0	0	0	0	0	0	0	0	0	0	0	0	0
	Desulfotomaculum	0	0	0	0	0	0	0	0	0	0	0	0	0	0	0	0	0	0	0	0	0	19	0	0	21	0	0	0	0	0	0	80	0	0	0	0	0	0	0	0	0	0	0	0	0	0	0	0
	Domibacillus	0	0	0	154	0	0	0	0	0	0	0	0	0	0	0	0	0	0	0	0	0	0	0	0	0	0	0	0	0	0	0	0	0	0	0	0	0	0	0	0	0	0	0	0	0	0	0	0
	Enterococcus	32913	30378	19405	21139	38929	2736	2516	1624	2174	2088	2174	894	1701	2823	843	1546	598	610	2650	820	1268	688	2177	3887	2090	968	844	648	886	1202	141285	156083	2026	674	7127	16858	4314	3451	1556	1265	73469	82256	5116	1158	10132	7982	1568	2860
	Exiguobacterium	10900	3082	11511	14078	3392	0	0	17	19	27	0	0	0	0	96	0	0	0	0	0	0	46	52	18	261	245	285	182	187	283	0	0	0	0	0	0	0	0	0	0	0	0	0	0	0	0	0	0
	Jeotgalibacillus	0	0	0	0	0	0	0	0	0	0	0	0	0	0	0	0	0	0	0	0	0	0	0	0	0	0	0	23	0	0	0	0	0	0	0	0	0	0	0	0	0	0	0	0	0	0	0	0
	Jeotgalicoccus	0	0	0	0	0	0	31	0	0	0	0	0	0	0	0	0	0	0	0	0	0	0	0	0	0	0	0	0	0	0	0	0	0	0	0	0	0	0	0	0	0	0	0	0	0	0	0	0
	Kurthia	428	139	282	0	189	0	0	0	0	0	0	0	0	0	0	0	0	0	0	0	0	0	0	0	0	0	0	0	0	0	0	0	0	0	0	0	0	0	0	0	0	0	0	0	0	0	0	0
	Laceyella	0	0	0	0	0	52	0	0	0	18	0	0	0	0	0	0	0	0	0	0	0	0	0	0	0	0	0	0	0	0	0	0	0	0	0	0	0	0	0	0	99	0	0	0	0	0	0	0
	Lachnoclostridium 10	0	112	27	0	122	0	0	0	0	0	0	0	0	30	43	0	0	18	0	0	0	0	17	0	272	0	0	0	0	0	0	0	0	0	0	0	0	0	0	0	0	0	0	0	0	0	0	0
	Lachnoclostridium 5	181	0	148	0	0	0	0	42	0	0	19	16	0	0	0	0	0	218	0	0	21	0	0	80	31	0	0	0	0	0	0	0	0	0	0	0	0	0	0	0	0	0	0	0	0	0	0	0
	Lactobacillus	10076	47269	18625	6724	51455	486252	527039	515673	533563	442463	437791	453479	457224	612314	634224	677306	689519	692865	652564	701864	622169	604506	588446	631573	670294	958	26660	13151	724	16635	65887	40154	657334	648985	392824	441388	56605	37049	451962	465208	239755	267629	682171	730648	559477	598626	140205	100762
	Lactococcus	64756	95779	84073	41185	94128	6278	4394	4409	3315	5989	6089	4989	6617	2774	3020	2691	2929	2631	2481	2229	3025	3634	3827	3557	2728	0	121	0	387	272	55003	52823	921	754	7195	10360	3355	2993	1743	2276	29566	33550	3720	2135	10195	10320	2203	2375
	Leuconostoc	165	1855	430	0	622	289	267	698	705	106	104	447	364	466	384	361	182	255	275	83	107	381	268	572	533	0	0	0	0	0	288	0	0	0	0	0	0	0	0	0	0	134	0	0	0	0	0	0
	Listeria	0	139	188	0	378	21	0	0	0	0	0	0	0	0	0	0	0	0	0	0	0	0	86	0	0	0	0	0	0	0	0	0	0	0	0	0	0	0	0	0	0	41	21	0	0	0	0	0
	Lysinibacillus	33	139	0	154	297	0	21	59	0	0	0	0	0	50	0	0	0	0	0	0	0	0	0	992	125	0	0	0	0	0	0	0	0	0	0	0	0	0	0	0	0	0	0	0	0	18	0	0
	Macrococcus	165	0	0	294	0	0	0	0	0	0	0	0	0	0	0	0	0	0	0	0	0	0	0	0	0	0	0	0	0	0	0	0	0	0	0	0	0	16	0	0	0	0	0	0	0	0	0	0
	Mogibacterium	0	0	0	0	0	0	0	0	0	0	0	0	0	0	0	0	0	0	0	0	0	0	0	0	0	0	44	0	0	0	0	0	0	0	0	0	0	0	0	0	0	0	0	0	0	0	0	0
	Nosocomiicoccus	0	0	0	0	0	0	0	0	0	0	0	0	0	0	0	0	20	0	0	0	0	0	0	0	0	0	0	0	0	0	0	0	0	0	0	0	0	0	0	0	0	0	0	0	0	0	0	0
	Oceanobacillus	0	84	0	0	41	0	0	0	0	0	0	0	0	0	0	0	0	0	0	28	0	0	0	0	0	0	0	0	87	23	0	0	0	20	0	0	0	0	0	0	0	0	0	0	0	0	0	0
	Paenibacillus	1548	767	3685	2914	865	0	0	93	19	0	0	88	0	0	21	0	20	73	127	18	21	0	17	71	31	0	164	114	62	136	0	23	0	0	0	0	0	0	0	0	0	0	21	0	0	0	0	0
	Pediococcus	32501	119784	20077	121719	73372	126620	113106	122277	109716	185769	171781	148310	170075	53784	67913	57875	53475	41710	40924	53574	74795	71691	81570	28356	18532	0	1414	0	49605	9525	50092	52221	0	0	1289	2106	421343	499318	76509	65924	140634	152772	5616	993	2479	1783	370053	342249
	Ruminiclostridium 1	0	0	0	0	0	0	0	0	0	0	0	0	0	0	0	0	0	0	0	0	0	0	0	0	0	0	0	0	0	113	0	0	0	0	0	0	0	0	0	0	0	0	0	0	0	0	0	0
	Saccharibacillus	0	0	0	0	0	0	0	0	0	0	0	0	0	0	0	0	0	0	0	0	0	0	0	0	0	0	0	0	25	0	0	0	0	0	0	0	0	0	0	0	0	0	0	0	0	0	0	0
	Salinicoccus	0	0	699	98	0	0	0	0	0	0	0	0	0	20	0	0	0	0	0	0	0	0	0	0	0	234	131	137	187	0	0	0	0	0	0	0	0	0	0	0	0	0	0	0	0	0	0	0
	Shimazuella	0	0	0	0	0	0	0	76	0	0	0	0	93	0	0	0	0	0	0	0	32	0	0	0	0	0	0	0	0	0	0	0	0	0	0	0	0	0	0	0	0	0	0	0	0	0	0	0
	Sporomusa	0	0	0	0	0	21	0	0	0	0	0	0	0	0	0	0	0	0	0	0	0	0	0	0	0	0	0	0	0	0	0	0	0	0	0	0	0	0	0	0	0	0	0	0	0	0	0	0
	Staphylococcus	4874	1618	3832	3446	2054	0	62	0	0	0	0	24	0	20	0	0	0	0	0	0	0	0	0	0	0	1139	778	842	537	340	0	68	48	161	0	171	0	62	0	155	30	0	302	165	145	0	115	111
	Terrisporobacter	0	0	0	0	54	0	0	0	0	0	0	0	0	0	0	0	0	0	0	0	0	0	0	0	0	0	0	0	0	0	0	0	0	0	0	0	0	0	0	0	0	0	0	0	0	0	0	0
	Thermoanaerobacterium	0	0	0	42	0	0	0	0	0	0	0	0	0	0	0	0	0	0	0	0	0	0	0	0	0	0	0	0	0	0	0	0	0	0	0	0	0	0	0	0	0	0	0	0	0	0	0	0
	Thermoflavimicrobium	0	0	0	0	0	0	0	0	0	0	0	0	0	0	0	21	0	0	0	0	0	0	0	0	0	0	0	0	0	0	0	0	0	0	0	0	0	0	0	0	0	0	0	0	0	0	0	0
	Tumebacillus	33	0	0	0	0	0	0	0	0	0	0	0	0	0	0	0	0	0	0	0	0	0	0	0	0	0	0	0	0	34	0	0	0	0	0	0	0	0	0	0	0	0	0	0	0	0	0	0
	Veillonella	0	0	0	0	0	0	0	0	0	0	0	0	0	0	0	0	0	0	0	0	0	0	0	0	0	0	0	0	0	0	0	0	0	0	0	0	0	0	0	0	20	0	0	0	0	0	0	0
	Weissella	303576	349448	175488	139859	382766	49076	46655	35435	34887	64273	40400	96649	84477	22528	20876	39834	33457	23231	29891	38313	46660	70278	53850	50715	45352	0	0	0	0	0	16889	12896	165	60	166	396	172	70	153	0	16384	13907	2001	232	529	573	0	0
	Youngiibacter	0	0	40	0	0	0	0	0	0	0	0	0	0	0	0	0	0	0	0	0	0	0	0	0	0	0	0	0	0	0	0	0	0	0	0	0	0	0	0	0	0	0	0	0	0	0	0	0
	Unassigned	23841	55373	16634	27148	58522	128138	136496	126442	113582	135631	127166	143473	139449	85645	79845	66988	73026	61327	52402	88305	98029	81460	95132	43172	35715	64	121	819	2022	635	22342	20441	155	0	6151	1332	31448	18330	37298	34182	72679	99423	1938	1646	5839	6441	96615	73308
	Firmicutes Total	488294	708742	356718	380159	709497	799523	830679	807467	798610	836363	785636	848417	860000	780771	807362	847230	853471	824403	783373	885465	846287	832796	825501	766899	779394	15259	43886	26290	65915	41651	351841	335219	660678	650694	415015	472881	517525	561551	569349	569301	572990	650796	700936	737093	588795	625806	610759	521735
Planctomycetes	Tepidisphaera	0	0	0	0	0	0	0	17	19	0	0	0	0	0	0	0	0	0	0	0	0	0	0	0	0	0	0	0	0	0	0	0	0	0	0	0	0	0	0	0	0	0	0	0	0	0	0	0
	Unassigned	247	28	215	238	0	21	0	0	0	0	0	0	0	0	0	21	0	0	0	0	0	0	0	0	0	0	0	0	0	0	0	0	0	0	0	0	0	0	0	0	0	0	0	0	0	0	0	0
	Planctomycetes Total	247	28	215	238	0	21	0	17	19	0	0	0	0	0	0	21	0	0	0	0	0	0	0	0	0	0	0	0	0	0	0	0	0	0	0	0	0	0	0	0	0	0	0	0	0	0	0	0
Proteobacteria	Acetobacter	0	0	0	0	0	0	0	0	0	0	0	0	0	30	0	0	0	0	0	0	0	0	0	0	0	0	0	0	0	0	0	0	0	0	0	0	0	0	0	0	0	0	0	0	0	0	0	0
	Achromobacter	0	0	323	0	0	0	0	0	0	0	0	0	0	30	64	0	0	0	63	0	0	0	0	0	0	0	0	57	0	0	0	0	0	0	0	0	0	0	0	0	0	0	0	0	0	0	0	0
	Acidovorax	49	0	175	42	0	0	21	0	0	212	0	0	0	0	0	0	0	0	0	0	0	0	276	0	0	596	307	0	499	340	0	0	0	0	0	99	0	78	0	0	0	0	0	0	0	0	0	0
	Acinetobacter	17041	3710	11229	14667	5135	4523	4302	1321	1846	2848	3218	3416	2505	1902	2049	5752	5220	2421	2270	2579	3281	5363	5235	2708	2550	1543	2487	1832	2159	2880	199	545	252	412	693	729	1198	768	332	446	30	83	615	1092	674	627	991	394
	Allorhizobium-Neorhizobium-Pararhizobium-Rhizobium	6751	1939	4653	5421	1473	558	554	825	1256	442	301	216	299	466	416	155	345	546	264	212	0	474	328	929	1160	1820	1293	990	699	1281	111	0	78	0	146	0	213	310	136	0	188	83	188	0	187	90	240	0
	Altererythrobacter	0	0	0	0	0	0	0	0	0	0	0	0	0	0	0	0	0	0	0	0	0	0	0	0	0	149	0	0	0	147	0	0	0	0	0	0	0	0	0	0	0	0	0	0	0	0	0	0
	Ancylobacter	0	0	0	0	27	0	0	0	0	0	0	0	0	0	21	0	0	0	0	0	0	19	0	0	0	0	0	23	0	0	0	0	0	0	0	0	0	23	0	0	0	0	0	0	0	0	0	0
	Asaia	148	0	847	995	0	0	72	34	97	62	104	136	0	0	0	0	30	0	0	0	0	139	0	0	105	0	0	0	0	0	0	0	0	0	0	0	0	0	0	0	0	0	0	0	0	0	0	0
	Aureimonas	1861	0	1399	1849	662	547	390	539	705	469	0	263	411	535	342	557	436	373	771	276	277	734	510	590	585	1554	1238	1456	1335	1565	0	0	0	0	0	0	0	295	221	209	0	268	344	223	187	170	298	202
	Azospirillum	708	1004	363	560	351	0	0	311	367	0	0	64	47	248	512	0	142	473	496	0	96	84	35	643	763	0	175	0	162	0	0	0	0	0	0	0	0	0	0	0	0	0	0	25	0	0	0	0
	Azotobacter	0	0	0	70	0	0	0	0	0	0	0	0	0	0	0	0	0	0	0	0	0	0	0	0	0	0	0	0	0	0	0	0	0	0	0	0	0	0	0	0	0	0	0	0	0	0	0	0
	Bordetella	0	0	0	0	0	0	21	0	48	0	0	32	0	30	0	0	0	0	0	0	0	0	0	0	0	0	0	0	0	0	0	0	0	0	0	0	0	0	0	0	0	0	0	0	0	0	0	0
	Bosea	445	112	0	308	0	0	0	0	0	44	0	0	0	0	53	0	0	0	21	0	0	0	0	0	0	32	66	46	50	79	0	0	0	0	0	0	0	0	0	0	0	0	0	0	0	0	0	0
	Bradyrhizobium	0	0	0	70	0	0	0	0	0	0	0	0	0	0	0	0	0	0	0	0	0	0	0	0	31	0	0	0	0	0	0	0	0	0	0	0	0	0	0	0	0	0	0	0	0	0	0	0
	Brevundimonas	823	1060	699	574	1230	0	164	244	39	106	56	0	0	267	224	0	51	1129	665	0	85	149	190	1296	826	21	230	216	300	204	0	45	29	0	0	90	33	0	0	0	0	0	115	0	41	36	77	30
	Burkholderia-Caballeronia-Paraburkholderia	296	209	403	0	0	0	0	34	0	0	0	0	0	0	0	41	0	18	127	37	0	0	112	0	0	0	0	0	0	0	0	0	0	0	0	0	0	0	0	0	0	0	0	0	0	0	0	0
	Buttiauxella	148	0	403	0	41	299	462	194	19	0	38	0	19	0	982	52	0	55	0	0	0	790	0	107	0	0	0	0	0	0	0	0	0	0	0	0	0	0	0	0	40	0	0	0	0	0	0	0
	Caulobacter	0	0	0	0	0	41	0	0	0	0	0	80	28	0	0	52	0	0	0	0	0	0	17	63	0	0	0	0	0	0	0	45	0	0	0	0	16	0	0	0	0	0	0	0	0	0	0	0
	Cellvibrio	0	0	0	0	0	0	0	0	0	0	0	0	0	0	0	0	0	27	21	0	0	0	0	0	0	0	0	0	0	0	0	0	0	0	0	0	0	0	0	0	0	0	0	0	0	0	0	0
	Chania	0	42	0	0	0	0	0	0	0	0	0	0	0	0	0	0	0	0	0	0	0	0	0	0	0	0	0	0	0	0	0	0	0	0	0	0	0	0	0	0	0	0	0	0	0	0	0	0
	Citrobacter	0	0	0	0	0	0	0	17	0	0	0	0	0	0	0	0	0	0	0	0	0	0	0	18	0	0	0	0	0	0	0	0	0	0	0	0	0	0	0	0	0	0	0	0	0	0	0	0
	Comamonas	609	935	726	630	1216	0	0	412	425	0	292	64	28	20	779	165	0	100	338	0	53	46	0	733	920	0	0	0	0	0	0	0	0	0	0	0	0	0	0	0	0	0	0	0	0	0	0	0
	Cronobacter	0	1576	296	42	0	0	113	0	0	0	0	16	0	0	0	0	0	0	0	0	0	0	0	0	303	0	0	0	0	0	0	0	0	0	0	0	0	0	0	0	0	0	0	0	0	0	0	0
	Cupriavidus	33	0	0	0	0	0	0	0	0	0	0	0	0	0	0	0	0	0	0	0	0	0	0	0	0	0	0	0	0	0	0	0	0	0	0	0	0	0	0	0	0	0	0	0	0	0	0	0
	Cystobacter	0	56	0	0	0	0	0	0	29	27	0	0	0	0	21	0	0	0	0	0	0	0	0	0	0	43	88	0	200	0	0	0	19	0	0	0	0	0	0	0	0	0	0	0	0	0	0	0
	Devosia	626	683	350	784	297	134	21	219	19	0	85	0	56	218	235	144	0	337	179	0	32	0	78	411	439	0	0	0	312	181	0	0	0	0	0	0	0	0	17	0	0	0	0	0	0	54	0	0
	Dokdonella	0	0	0	0	0	0	0	0	0	0	0	0	0	0	0	0	0	0	0	0	0	0	0	0	0	0	0	0	0	113	0	0	0	0	0	0	0	0	0	0	0	0	0	0	0	0	0	0
	Ensifer	0	307	282	0	0	0	0	0	0	0	0	0	0	0	0	21	0	0	0	0	0	0	0	0	0	0	99	239	0	0	0	0	0	0	0	0	0	0	0	0	0	0	0	0	0	0	0	0
	Enterobacter	58763	23418	69052	46115	25593	24956	20093	19203	16642	22380	20063	14448	16738	21112	18304	22835	13876	11306	15626	9376	13583	14286	17155	21385	17309	19579	32961	27689	22887	32193	193932	177069	22482	29630	96388	94497	44088	39010	25809	31396	126691	106862	26975	23290	76195	65192	33683	30081
	Escherichia-Shigella	5236	3278	4599	3334	2054	1993	2803	2003	2319	1981	2964	1237	1178	2506	3832	2876	1277	1893	2439	1363	1353	1329	1348	2243	3198	362	427	0	449	533	2865	3454	359	704	1953	2205	525	504	0	0	1966	1455	458	25	2354	860	289	0
	Francisella	0	0	0	0	0	0	0	0	0	0	0	0	0	0	0	0	0	0	0	0	0	0	0	18	0	0	0	0	0	0	0	0	0	0	146	0	0	0	0	0	0	0	0	0	0	0	0	0
	Gibbsiella	0	0	0	0	0	0	0	0	0	0	56	0	0	0	0	0	0	0	106	0	341	0	0	71	0	1500	1622	1012	1198	1758	0	0	0	0	0	0	0	0	0	0	0	0	0	0	41	0	0	0
	Gluconobacter	0	0	0	112	68	0	0	0	19	0	0	0	0	0	107	0	0	0	0	0	0	0	35	170	31	0	0	0	0	0	0	0	0	0	0	0	0	0	0	0	0	0	0	0	0	0	0	0
	Herbaspirillum	362	0	0	140	54	83	21	84	0	0	0	0	0	0	0	21	20	46	0	0	0	0	0	0	0	21	0	0	0	0	0	0	0	0	0	0	0	0	0	0	0	0	0	0	0	0	0	0
	Hydrogenophaga	0	0	0	0	0	0	0	0	0	0	0	0	0	0	0	0	0	0	158	0	0	0	0	0	0	0	0	0	0	147	0	0	0	0	0	0	0	0	0	0	0	0	0	0	0	0	0	0
	Kaistia	0	0	0	28	41	0	0	0	0	0	0	0	0	0	0	0	0	0	0	0	0	0	0	0	0	0	0	0	0	0	0	0	0	0	0	0	0	0	0	0	0	0	0	0	0	0	0	0
	Klebsiella	27809	14143	25765	20522	15039	14600	15288	15534	14892	10650	17767	9172	10617	16901	14515	11453	9710	10341	10189	6585	10781	10540	12733	9151	11727	500	1304	956	0	896	10928	9896	0	0	5838	6039	2608	0	1012	956	5593	5612	1480	786	4739	4560	0	0
	Komagataeibacter	0	0	0	0	41	0	0	0	0	0	0	0	0	0	0	0	0	0	0	0	0	0	0	0	0	0	0	34	0	0	0	0	0	0	0	0	0	0	0	0	0	0	0	0	0	0	0	0
	Legionella	0	0	0	0	0	0	0	0	0	0	0	0	0	0	0	0	0	0	0	0	0	0	0	0	21	0	0	0	0	0	0	0	0	0	0	0	0	0	0	0	0	0	0	0	0	0	0	0
	Luteimonas	790	167	377	350	784	0	0	143	68	0	132	0	0	89	192	62	0	146	169	0	0	0	0	384	21	362	241	319	474	57	22	0	0	0	20	0	0	0	0	0	0	0	0	0	0	0	77	0
	Lysobacter	0	70	121	883	216	0	21	143	0	0	169	0	0	0	0	0	20	0	0	0	0	0	0	0	0	53	0	0	0	0	0	34	19	0	0	0	0	0	0	0	0	72	0	0	0	0	38	0
	Marinomonas	296	0	605	0	0	0	0	0	0	0	0	120	37	0	0	268	0	0	0	221	0	0	216	0	157	0	0	330	0	0	0	0	0	0	0	0	0	0	0	0	0	0	0	0	0	0	0	0
	Massilia	2552	1032	3523	4048	905	330	616	917	831	593	499	247	93	1040	523	289	223	1065	538	138	192	502	656	1457	732	2767	2575	2582	2309	3107	210	34	0	50	98	198	172	217	0	0	49	0	0	108	0	99	154	0
	Mesorhizobium	33	0	0	0	0	0	0	0	0	0	0	0	0	0	0	0	0	0	0	0	0	0	0	36	0	0	44	0	0	238	0	0	0	0	0	0	0	0	0	0	0	0	0	0	0	0	0	0
	Methylobacterium	6191	2720	4424	5211	1851	444	554	909	783	257	56	271	140	743	395	474	345	619	940	405	341	400	639	1233	993	1596	2553	2821	1884	2449	55	125	87	50	293	0	172	256	102	109	0	0	73	74	166	125	231	111
	Microbulbifer	0	0	0	0	0	0	0	0	0	0	0	0	0	0	0	0	0	0	0	0	0	0	0	18	0	0	0	0	0	0	0	0	0	0	0	0	0	0	0	0	0	0	0	0	0	0	0	0
	Microvirga	757	42	40	336	27	0	0	17	29	0	0	0	0	0	96	0	0	64	21	0	0	0	0	0	0	0	0	23	0	0	0	0	0	0	0	0	0	0	0	0	0	0	0	0	0	0	0	0
	Moraxella	0	0	0	0	324	0	21	0	0	0	0	32	0	0	0	0	0	0	0	37	0	0	17	0	0	0	0	0	0	0	0	0	0	0	0	0	0	0	0	0	0	0	0	0	0	0	0	0
	Novosphingobium	1284	460	861	1457	297	196	113	101	126	0	311	16	140	139	0	0	132	146	158	0	0	139	26	250	334	85	0	0	0	0	0	0	0	0	0	45	0	0	0	0	0	21	0	0	0	0	0	0
	Ochrobactrum	379	516	54	630	500	0	0	160	0	0	0	0	0	0	128	330	0	0	84	0	0	0	0	331	0	32	0	0	0	0	0	0	0	20	0	0	25	0	0	0	0	0	0	17	0	0	0	0
	Pandoraea	0	0	0	294	0	0	0	0	0	18	0	0	0	0	0	0	0	0	74	0	0	0	0	0	0	0	0	0	0	0	0	0	0	0	0	0	0	0	0	0	0	0	0	0	0	0	0	0
	Pantoea	26607	12190	38554	41857	10634	16541	9302	9887	10437	9385	11368	11957	9972	15742	8122	11567	9913	11151	14909	8648	12848	10828	13959	11618	15668	21005	30945	22957	25770	30266	3628	7101	2278	2695	8913	7263	3831	4110	3963	3741	4289	6273	3261	4219	5943	9218	5559	2324
	Paracoccus	1729	781	632	1037	865	227	123	143	454	0	104	128	112	505	448	165	334	674	443	92	21	65	181	912	826	160	460	182	362	805	0	23	0	40	68	0	0	78	17	0	119	0	167	0	0	0	87	51
	Pectobacterium	0	0	0	0	0	0	0	0	0	663	0	0	0	0	0	0	0	0	0	0	0	0	0	0	0	0	0	0	2346	0	1504	1568	0	0	0	0	0	0	0	0	0	1517	0	0	0	1854	0	1546
	Phyllobacterium	0	0	0	0	0	0	0	0	0	0	0	0	0	159	0	0	0	0	0	0	0	0	0	0	0	0	0	0	0	0	0	0	0	0	0	0	0	0	0	0	0	0	0	0	0	0	0	0
	Plesiomonas	0	0	0	0	0	0	0	0	0	0	0	0	0	0	0	0	0	0	0	0	0	0	0	0	0	0	0	0	0	0	0	0	0	0	0	0	0	0	0	0	0	0	0	0	21	0	0	0
	Providencia	0	0	0	0	0	0	0	0	0	0	0	0	0	0	0	0	0	0	0	0	0	19	0	0	0	0	0	0	0	0	0	0	0	0	0	0	0	0	0	0	0	0	0	0	0	0	0	0
	Pseudomonas	10521	1757	21596	23688	2500	2674	1325	892	1256	1486	1506	1437	1364	1189	1195	1990	1966	1365	1394	755	1097	1989	2280	956	1014	5916	6761	5210	5241	5284	0	0	175	282	78	135	295	240	230	319	0	0	698	604	249	0	260	172
	Pseudorhodoferax	0	0	0	28	0	0	0	0	0	0	0	0	0	0	0	0	0	0	0	0	0	0	0	0	0	0	0	0	0	0	0	0	0	0	0	0	0	0	0	0	0	0	0	0	0	0	0	0
	Pseudoxanthomonas	412	530	619	742	68	0	0	25	0	0	0	0	75	50	149	0	0	91	0	18	21	0	0	107	230	43	0	0	0	57	0	0	0	0	0	0	0	0	0	0	0	0	0	0	0	0	0	0
	Rhodoligotrophos	18852	16333	21233	28157	10661	4946	3491	4578	4513	4617	6569	4079	3449	4815	5422	3763	4642	7000	7877	3500	5284	6135	5572	7480	5843	193535	193108	201115	189273	203592	17851	18055	31121	29027	36200	19675	25772	19253	26455	23650	20939	18189	46491	41119	49376	35530	56680	72015
	Rhodoplanes	0	0	0	56	0	0	0	0	0	0	0	0	0	0	0	0	0	0	0	0	0	0	0	0	0	0	0	0	0	0	0	0	0	0	0	0	0	0	0	0	0	0	0	0	0	0	0	0
	Roseomonas	461	279	108	322	0	124	72	135	145	44	0	24	0	0	0	103	152	0	211	0	138	19	0	161	240	383	482	466	399	510	0	0	39	0	78	0	16	101	0	18	0	0	73	33	83	18	19	81
	Salmonella	14176	6625	1251	9147	2986	52	1941	4451	5509	44	1073	4725	402	7054	1644	3732	101	674	961	64	96	1301	1650	777	5592	596	2400	3629	0	1916	25129	21645	1881	0	8503	9928	1386	3342	0	182	16739	12205	2917	2672	7623	7068	3616	3890
	Serratia	0	0	0	0	0	0	0	0	0	0	0	0	0	40	0	0	0	0	0	0	0	0	0	0	0	0	0	0	0	0	0	0	601	0	0	0	0	0	0	0	0	0	0	0	0	0	0	0
	Shimwellia	0	0	202	0	0	0	0	0	0	0	0	0	0	0	0	0	0	0	0	0	0	0	0	0	0	0	0	0	0	0	0	0	0	0	0	0	0	0	0	0	0	0	0	0	0	0	0	0
	Sphingobium	0	167	121	0	176	0	21	0	0	44	0	0	0	20	0	0	0	0	21	0	21	0	0	45	0	32	88	0	0	0	0	0	0	0	0	0	0	0	0	0	0	0	0	0	21	0	0	0
	Sphingomonas	8595	3529	9817	13630	2297	1569	1232	1346	1759	1106	1242	806	766	1030	1163	1350	780	947	845	497	703	1106	1201	1332	1620	2607	2356	1979	2209	2155	33	34	48	141	195	459	418	644	264	200	109	21	511	240	446	278	327	192
	Sphingopyxis	0	237	121	0	0	0	0	0	0	133	0	200	0	357	139	0	0	0	0	18	0	0	0	0	178	0	0	0	0	0	0	0	0	0	0	0	0	0	0	0	0	0	0	83	0	0	0	0
	Stenotrophomonas	7409	5091	8068	10716	2824	1187	524	968	908	478	1063	511	364	1545	1025	649	426	1420	1256	368	586	929	544	4173	1327	447	778	842	611	726	0	80	0	171	176	0	172	16	0	0	0	0	552	223	0	170	500	0
	Thiohalobacter	0	84	0	0	27	0	0	0	0	44	47	48	0	0	0	0	0	0	0	0	0	0	0	0	0	0	0	0	0	0	0	114	0	0	0	0	0	0	0	0	0	103	0	0	0	0	0	141
	Thiothrix	0	28	0	0	27	0	0	0	0	0	0	0	28	0	0	0	0	0	0	0	0	0	0	0	0	0	0	0	0	0	0	0	0	0	0	0	0	0	0	0	0	0	0	0	0	0	0	0
	Undibacterium	49	0	0	0	0	0	0	0	0	0	0	0	0	0	0	0	0	0	0	0	0	0	0	0	0	0	0	0	0	0	0	0	0	0	0	0	0	0	0	0	0	0	0	0	0	0	0	0
	Variovorax	0	0	0	0	0	0	123	0	0	0	0	0	0	0	0	0	0	218	0	0	0	0	0	0	0	0	0	0	0	0	0	34	0	0	0	0	0	0	0	0	0	0	0	0	0	0	0	0
	Vibrio	0	0	0	70	0	0	0	0	0	0	0	0	0	2239	0	82	0	36	0	0	0	0	0	0	0	0	0	0	0	0	0	0	0	0	0	0	0	0	17	0	0	0	0	0	0	0	0	0
	Xanthomonas	692	767	417	616	122	0	31	42	68	0	0	0	0	317	64	21	71	46	95	0	21	37	52	0	376	500	285	0	324	363	55	0	0	0	88	0	33	54	102	100	0	72	31	124	0	0	106	0
	Yersinia	0	0	457	0	0	21	0	0	0	18	0	0	0	0	0	0	51	0	0	0	0	0	0	0	0	0	0	0	0	0	0	0	0	0	0	0	0	0	0	0	0	0	0	0	0	0	0	0
	Yokenella	0	0	0	0	0	0	0	93	0	0	0	0	0	0	0	0	71	0	0	0	0	0	0	0	0	0	0	0	0	0	0	0	0	0	0	0	0	0	0	0	0	0	0	0	0	0	0	0
	Unassigned	161914	79851	138723	142619	88885	82469	70004	65880	75515	57373	76405	64481	59467	79275	76398	50669	56789	40754	60310	35670	46064	59273	55327	49982	64292	22995	29860	29179	26344	33509	208233	224279	20883	24171	91253	103552	32432	30101	17008	19599	130140	118417	28090	23215	70397	76910	27758	58889
	Proteobacteria Total	385406	185729	373487	382162	180296	158515	133836	131802	141125	115525	145488	118225	108336	160610	139561	119637	107122	95481	124041	70862	97315	116696	120372	121787	139412	280832	315231	306183	287797	327354	464756	464181	80351	87392	251128	244915	113407	99398	75684	80926	306890	271250	113039	98173	218742	202860	130991	170119
Tenericutes	Spiroplasma	0	0	0	0	0	0	0	0	0	0	0	0	0	0	0	0	0	0	0	0	0	0	0	0	0	0	0	0	0	23	0	0	0	0	0	0	0	0	0	0	0	0	0	0	0	0	0	0
	Tenericutes Total	0	0	0	0	0	0	0	0	0	0	0	0	0	0	0	0	0	0	0	0	0	0	0	0	0	0	0	0	0	23	0	0	0	0	0	0	0	0	0	0	0	0	0	0	0	0	0	0
Verrucomicrobia	Haloferula	0	0	0	0	0	0	0	0	0	0	0	16	0	0	0	0	0	0	0	0	0	0	0	0	0	0	0	0	0	0	0	0	0	0	0	0	0	0	0	0	0	0	0	0	0	0	0	0
	Luteolibacter	115	0	121	182	54	0	31	0	0	0	0	0	0	0	0	0	0	0	0	28	32	0	0	0	0	0	0	0	0	0	0	0	0	0	0	0	0	0	0	0	0	0	0	0	0	0	0	0
	Prosthecobacter	296	0	134	210	81	0	0	0	0	0	0	0	0	0	53	0	0	0	0	0	0	0	0	0	0	0	0	0	0	0	0	0	0	0	0	0	0	0	0	0	0	0	0	0	0	0	0	0
	Unassigned	0	0	40	0	0	0	0	0	0	0	0	0	0	0	0	0	0	0	0	0	0	0	0	0	0	0	0	0	0	0	0	0	0	0	0	0	0	0	0	0	0	0	0	0	0	0	0	0
	Verrucomicrobia Total	412	0	296	392	135	0	31	0	0	0	0	16	0	0	53	0	0	0	0	28	32	0	0	0	0	0	0	0	0	0	0	0	0	0	0	0	0	0	0	0	0	0	0	0	0	0	0	0
[truncated: 2 more columns]
